# Supplementary material
Source: publisher site journal article supplement (https://www.dovepress.com/article/616433)
Supplement: Supplementary file 1 [file 616433%20Supplementary%20Table%201_1.docx]

**Supplementary Table 1. Definitions, coding, and multicollinearity assessment of variables included in the final model**

| Variable type | Variable name | Value assignment | VIF |
| --- | --- | --- | --- |
| Independent | Age | Continuous | 1.015 |
| Independent | Duration of pain | Continuous | 1.017 |
| Independent | DM | No =0, Yes =1 | 1.013 |
| Independent | TNF-α | Continuous | 1.018 |
| Independent | IL-6 | Continuous | 1.024 |
| Independent | BDNF | Continuous | 1.009 |
| Dependent | Outcome | Effective =0, Ineffective =1 |  |

DM, diabetes mellitus; TNF-α, tumor necrosis factor-alpha; IL-6, interleukin-6; BDNF, brain-derived neurotrophic factor; VIF, variance inflation factor.
